# Supplementary material for: Effects of dietary guanidinoacetic acid on growth performance, guanidinoacetic acid absorption and creatine metabolism of lambs
Source: PLoS One. 2022 Mar 11;17(3):e0264864. doi: 10.1371/journal.pone.0264864 (PMC8916673; doi:10.1371/journal.pone.0264864)
Supplement: S8 Table — (XLSX) [file pone.0264864.s008.xlsx]

## Sheet: Sheet1
S8 Table. The mRNA expression of GAMT in lambs liver
TRT	GAMT
CON-1	1
CON-2	1.16
CON-3	1
CON-4	0.8
CON-5	0.98
I-1	1.35
I-2	1.09
I-3	0.82
I-4	1.1
I-5	0.84
II-1	0.99
II-2	1.01
II-3	0.98
II-4	0.91
II-5	1.27
III-1	0.86
III-2	0.84
III-3	1.24
III-4	1.24
III-5	1.09
